# Supplementary material for: Associations of MDM2 rs2279744 and TP53 rs1042522 polymorphisms with cervical cancer risk: A meta-analysis and systematic review
Source: Frontiers journal article supplement (doi:10.3389/fonc.2022.973077), 2022-08-19

**FIGURE S1 |** Forest plot of subgroup analysis of MDM2 rs2279744 polymorphism and cervical cancer susceptibility in the dominant model (GG + GT vs TT). (A) Subgrouped by ethnicity; (B) subgrouped by source of control; (C) subgrouped by quality score; (D) subgrouped by adjustment.


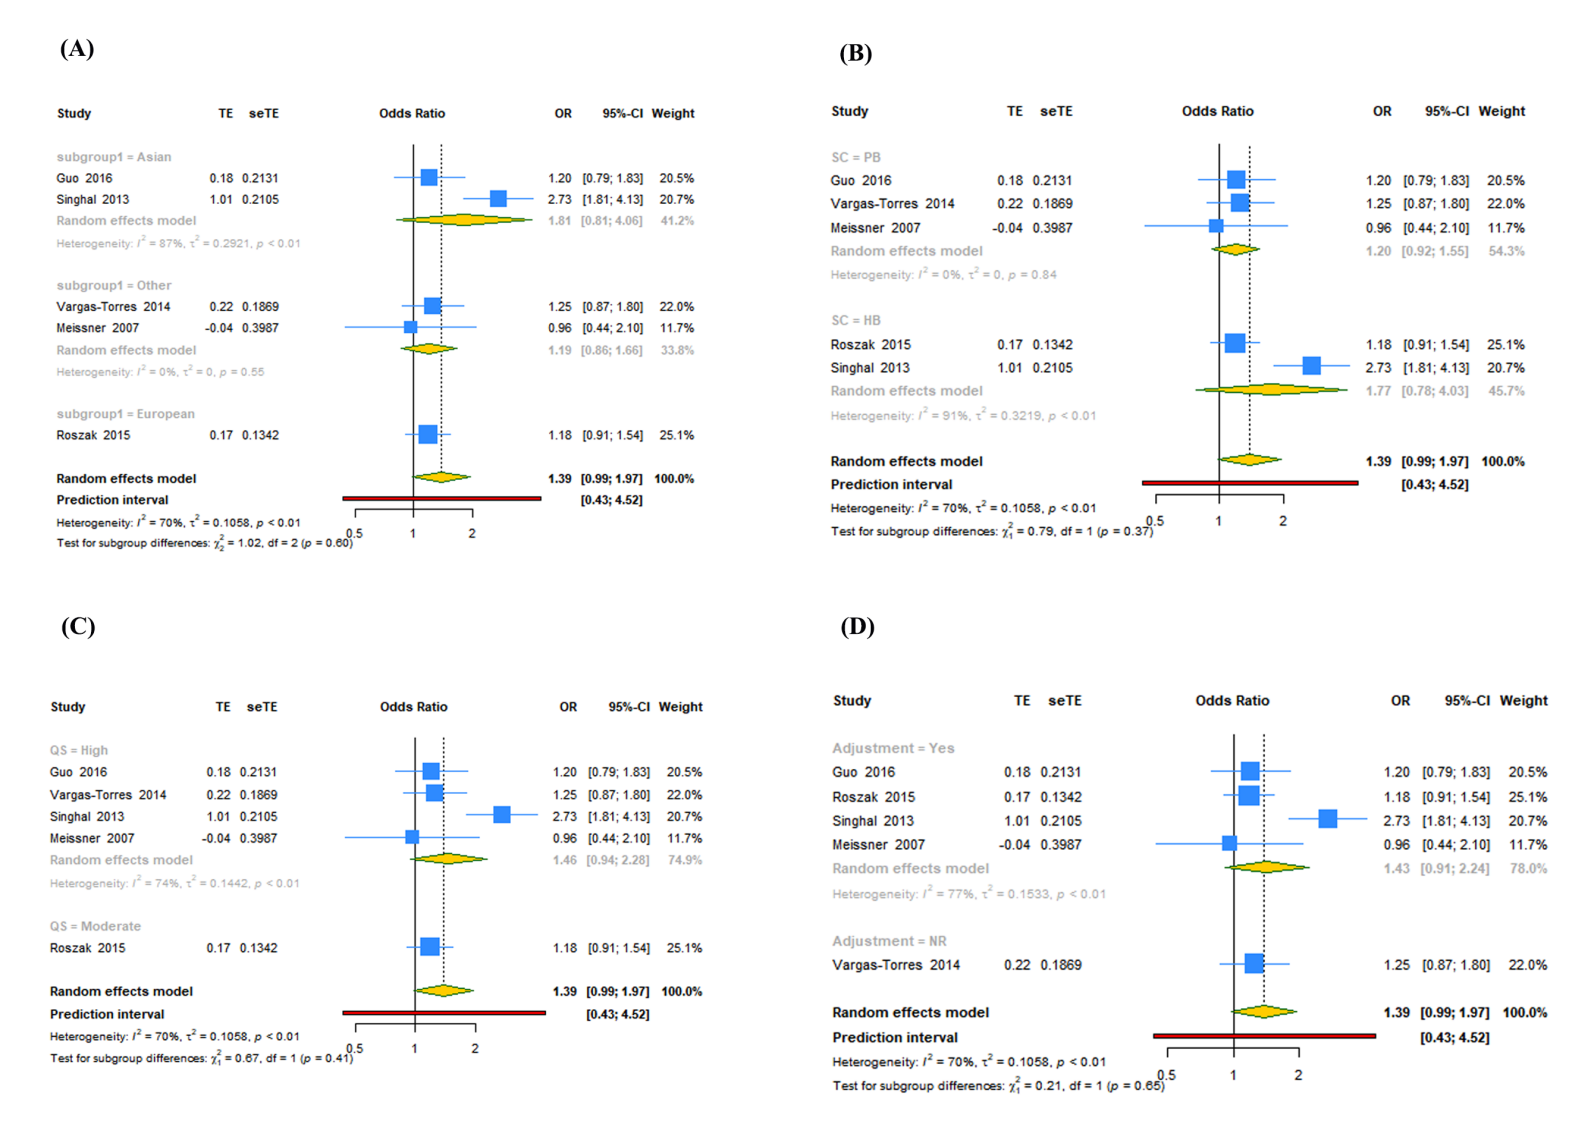


**FIGURE S2 |** Forest plot of subgroup analysis of MDM2 rs2279744 polymorphism and cervical cancer susceptibility in the recessive model (GG vs GT + TT). (A) Subgrouped by ethnicity; (B) subgrouped by source of control; (C) subgrouped by quality score; (D) subgrouped by adjustment.


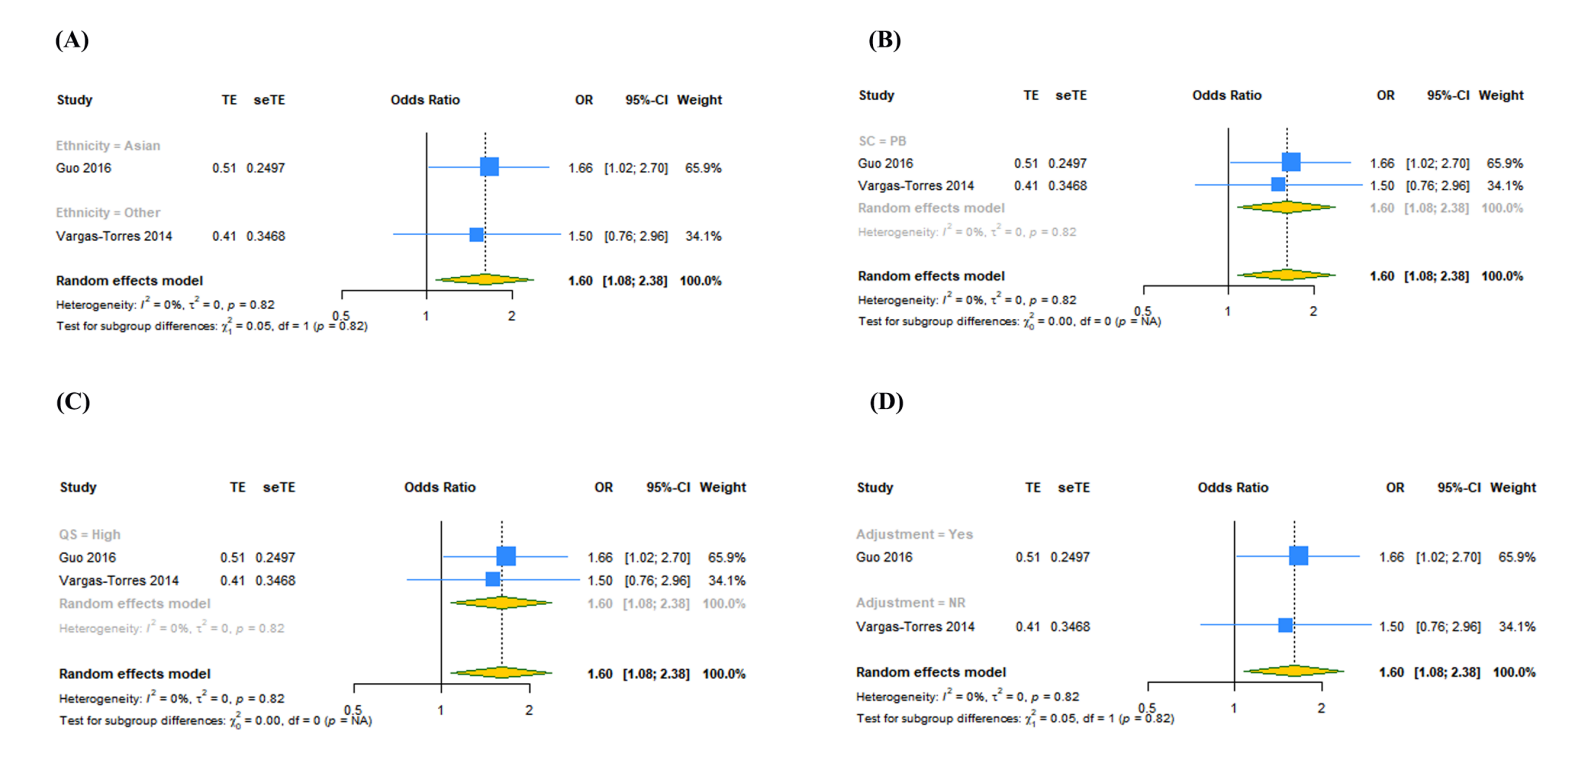


**FIGURE S3 |** Forest plot of subgroup analysis of MDM2 rs2279744 polymorphism and cervical cancer susceptibility in the heterozygote model (GT vs TT). (A) Subgrouped by ethnicity; (B) subgrouped by source of control; (C) subgrouped by quality score; (D) subgrouped by adjustment.


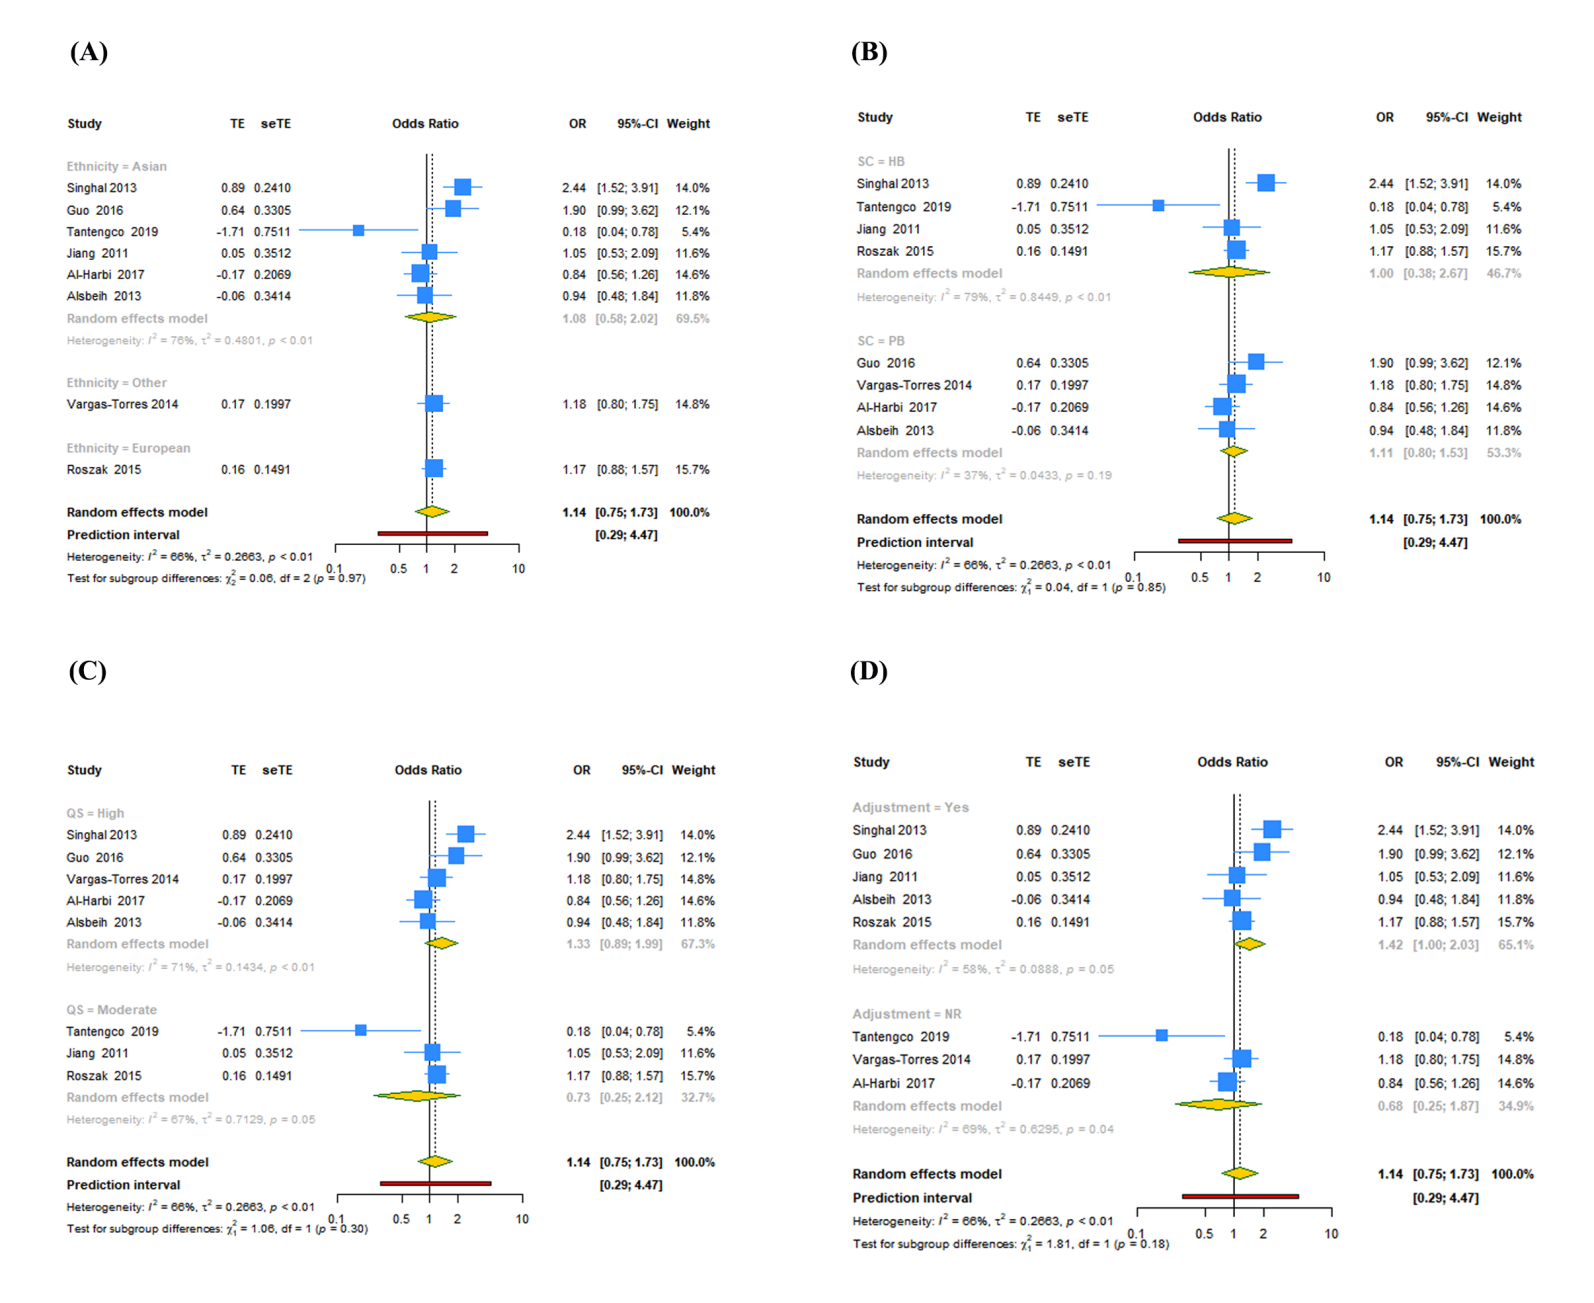


**FIGURE S4 |** Forest plot of subgroup analysis of MDM2 rs2279744 polymorphism and cervical cancer susceptibility in the homozygote model (GG vs TT). (A) Subgrouped by ethnicity; (B) subgrouped by source of control; (C) subgrouped by quality score; (D) subgrouped by adjustment.


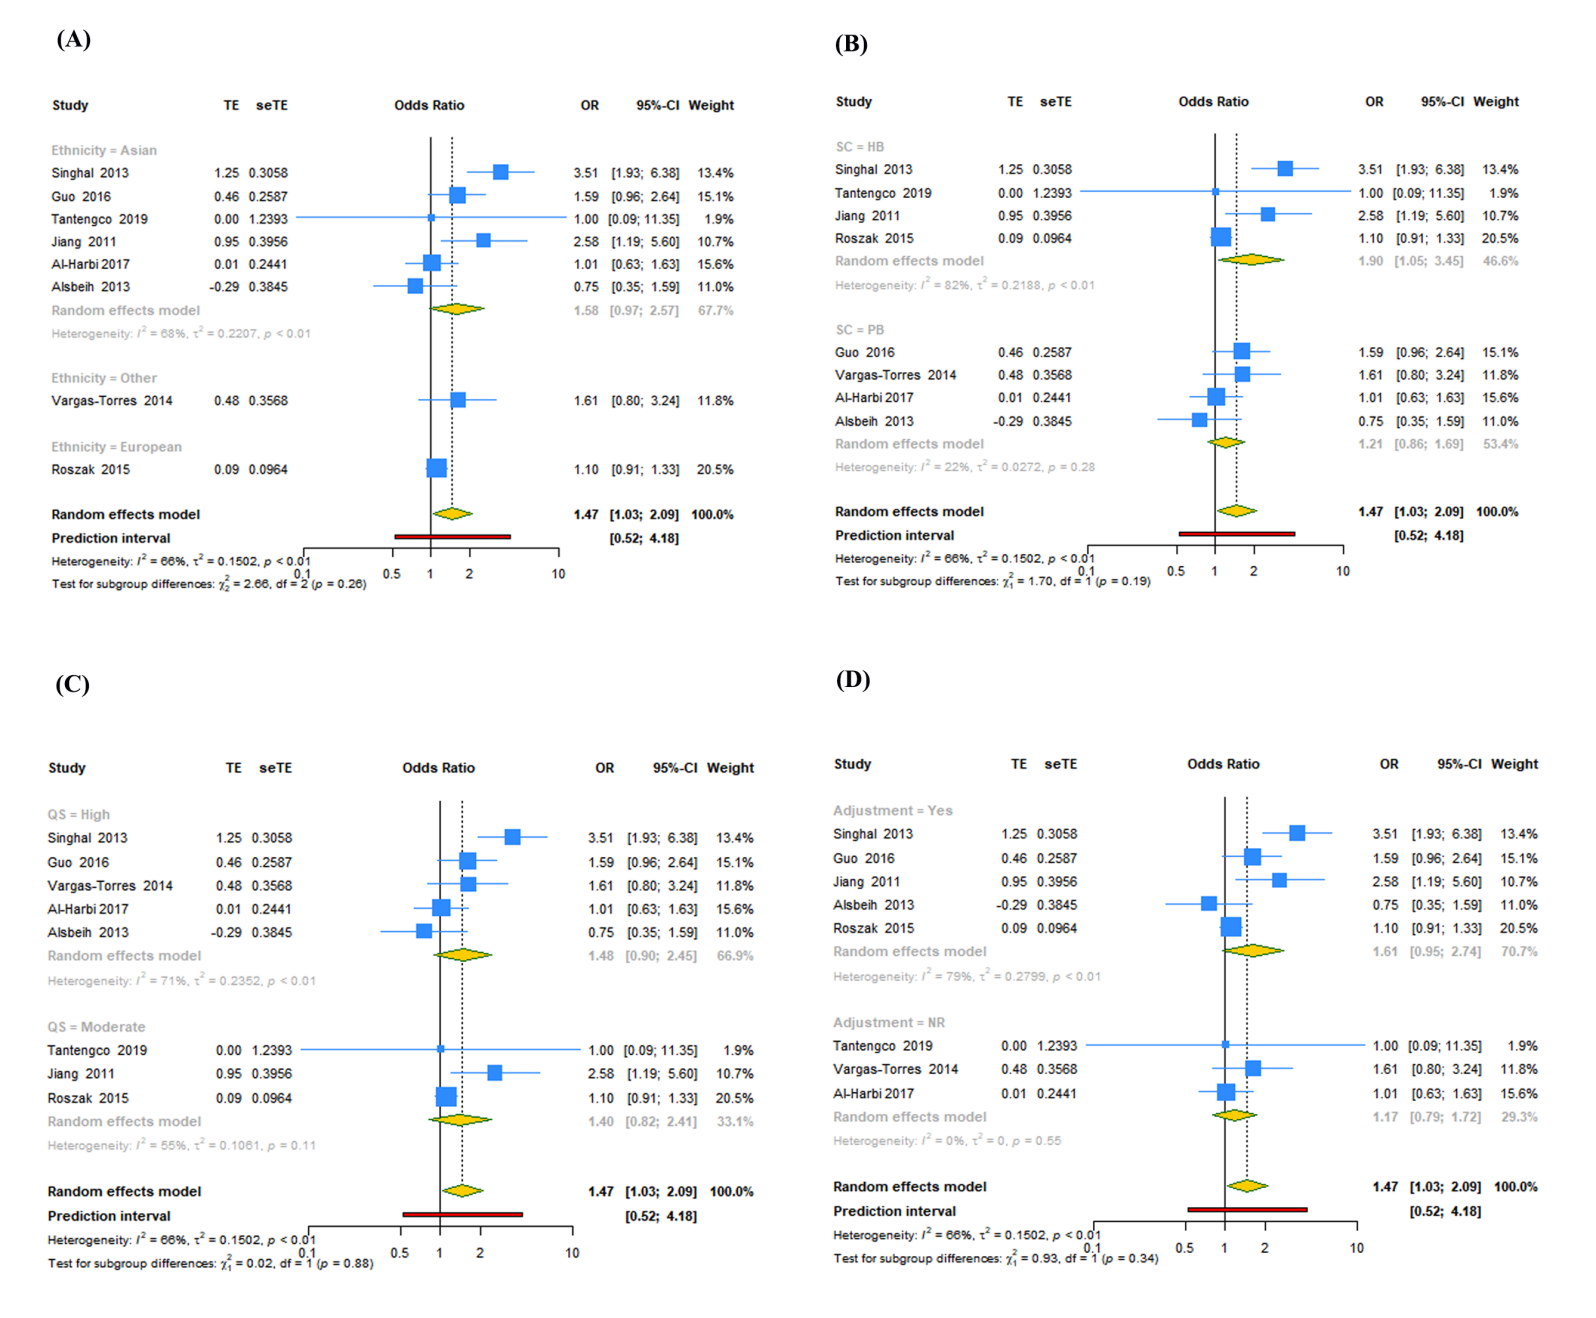


**FIGURE S5 |** Forest plot of subgroup analysis of MDM2 rs2279744 polymorphism and cervical cancer susceptibility in the allele model (G vs T). (A) Subgrouped by ethnicity; (B) subgrouped by source of control; (C) subgrouped by quality score; (D) subgrouped by adjustment.


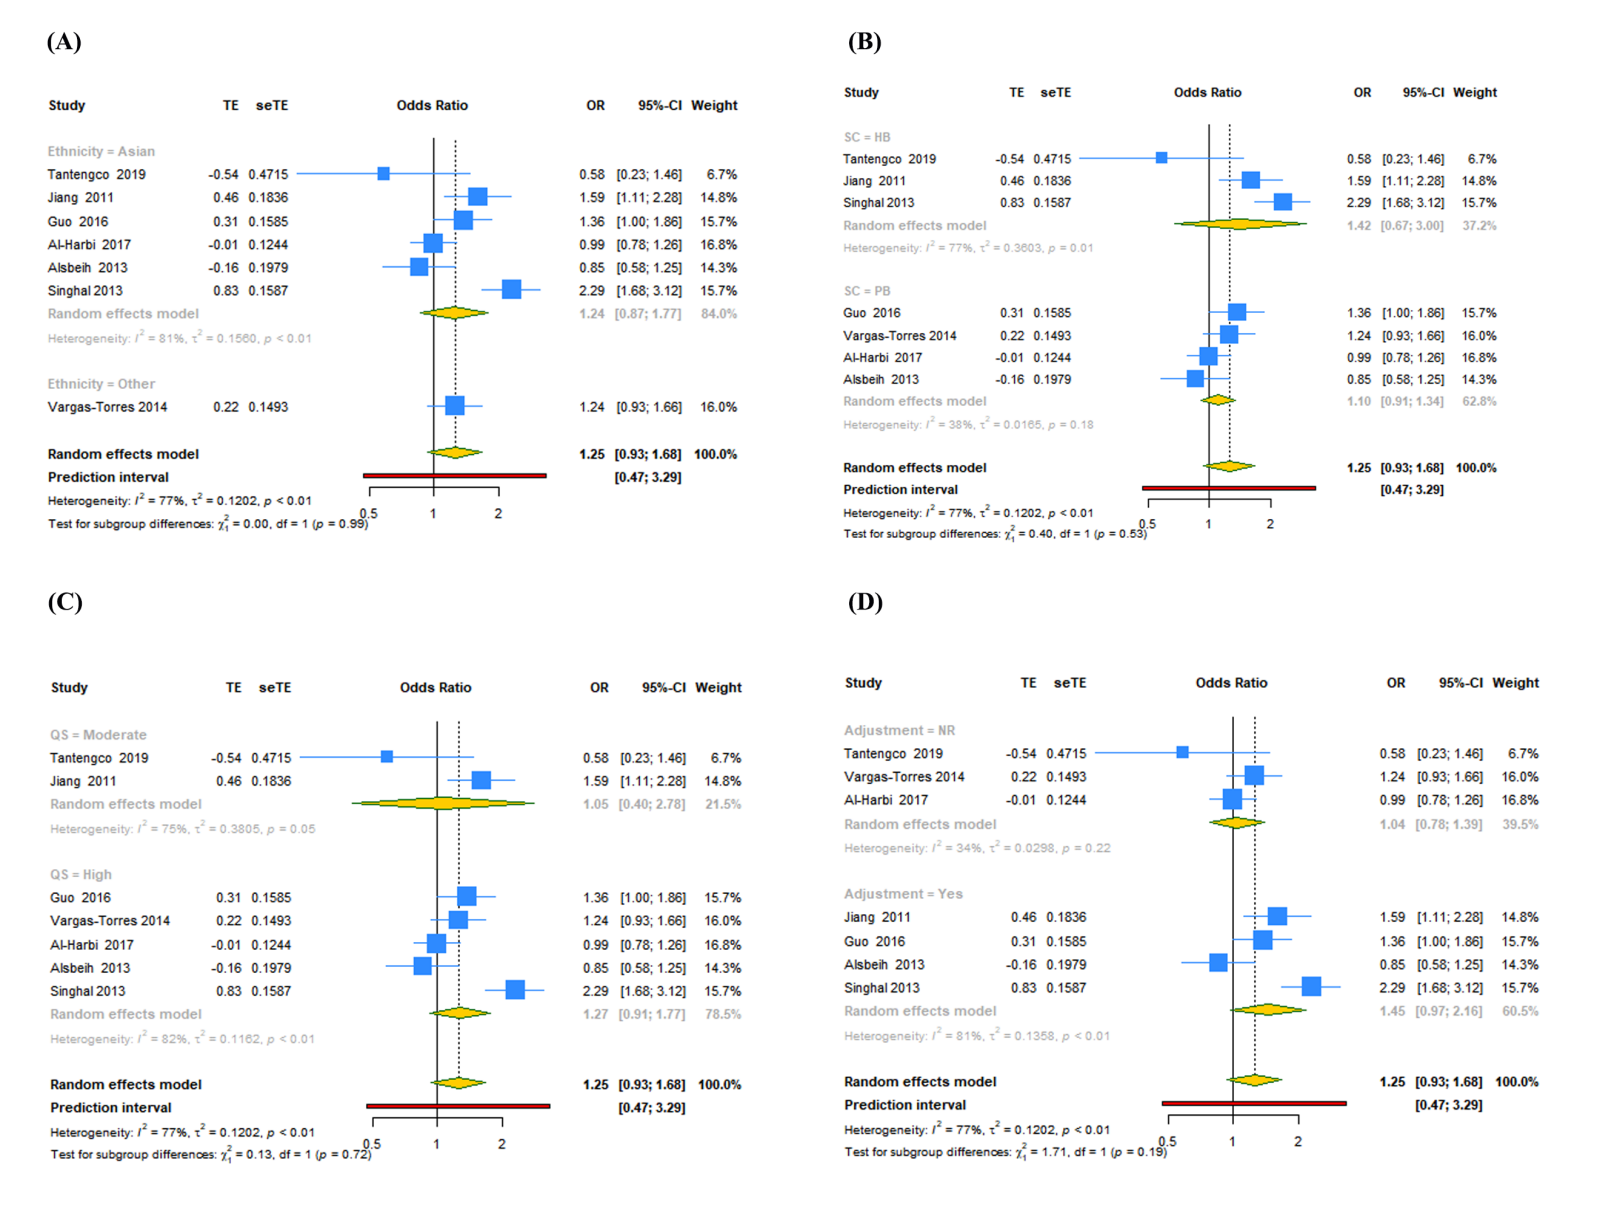

Supplement: Data_Sheet_2.docx [file Data_Sheet_2.docx]
